# Supplementary material
Source: PubMed Central journal article supplement (PMC5989926)
Supplement: NIHMS77659-supplement-Supplementary_Figures_and_Table_Legends.pdf [file NIHMS77659-supplement-Supplementary_Figures_and_Table_Legends.pdf]

### **Supplementary Figure Legends:**

#### **Supplementary Figure 1**

Pedigree of the family with *THRA* mutation, showing their thyroid function tests and genotype.

#### **Supplementary Figure 2**

Amplicons encompassing the mutant codon (A263V) in TR $\alpha$ 1 or  $\alpha$ 2 cDNAs, synthesized from PBMC RNA in the patient (P1) or control subject, were generated using a common forward ( $\alpha$ -FOR) and specific ( $\alpha$ 1-REV,  $\alpha$ 2-REV) reverse primers (upper panel). The location of Cac8I restriction sites (vertical line) together with expected size of DNA products following such enzymatic digestion of either WT or A263V mutant TR $\alpha$ 1 or  $\alpha$ 2 cDNAs is shown in the middle panel. Gel electrophoresis indicates three fragments (223bp, 174bp, 102bp) from Cac8I digestion of WT TR $\alpha$ 1 cDNA (Control), whereas loss of one Cac8I site in the A263V mutant cDNA from the patient (P1), yields a novel band (276bp) together with lower intensity fragments (174, 102bp) bands, with the 223bp band (asterisk) common to both cDNA species being unchanged. Likewise RFLP analysis of  $\alpha$ 2 cDNAs yields 174 and 102bp bands derived from WT alleles in the control subject, whereas a high intensity 276bp band

in P1 reflects loss of a Cac8I site derived from the mutant allele. Additional bands (asterisked 153bp, 122bp) present in both subjects, confirm that the digested cDNAs are  $\alpha 2$ -derived. Electropherograms (lower panel) show sequencing of  $\alpha 1$  and  $\alpha 2$  cDNAs and heterozygosity for the single nucleotide substitution (T/C) in P1 or homozygosity for the wild type nucleotide (C) in the control subject.

### **Supplementary Figure 3**

Radiolabelled T3 binding to in vitro translated WT TR $\alpha 1$ , A263V mutant TR $\alpha 1$ , WT TR $\beta 1$  and A317V mutant TR $\beta 1$  proteins, in the absence (open bars) or presence (black bars) of excess (100nM) unlabelled hormone, is shown. The inset shows comparable parallel translation of  $^{35}$ S-methionine labelled wild type and mutant proteins.

### **Supplementary Figure 4**

Protein-protein interaction assays in JEG-3 cells cotransfected with a reporter gene (UASTKLUC), vectors expressing GAL4-coactivator (TRAP220) or GAL4-corepressor (NCoR) fusion proteins and constructs expressing a heterologous activation domain linked to TRs (VP16-WT, VP16-A263V). Western blotting (inset) confirmed comparable VP16-receptor fusion expression.

### **Supplementary Table**

Thyroid function tests, reverse T3 and thyroglobulin levels, together with *THRB* genotype, in family with A317V TR $\beta$  mutation. Abbreviation: ND: not done.

### **Supplementary Figure 5**

JEG-3 cells were transfected with empty, WT or A317V TR $\beta$  expression vectors together with a thyroid hormone responsive reporter gene, assaying T3-dependent activation.

### **Supplementary Figure 6**

Dominant negative inhibition by A317V mutant TR $\beta$  was tested in JEG-3 cells cotransfected with reporter gene and equal combinations of expression vectors as indicated. **\*\*p<0.01.**

### **Supplementary Figure 7**

Crystallographic modelling of the TR $\beta 1$  ligand binding domain (LBD) bound to T3 (blue), highlighting the normal amino acid (alanine 317, green), with substitution of the larger valine residue (red) predicting steric hindrance to T3 binding.

### **Supplementary Figure 8**

Clinical photographs of skin tags from other patients with *THRA* mutations. Affected father (panel A) and proband (panel B) with F397fs406X mutation and child (panel C) with E403X mutation in TR $\alpha$ 1.

### **Supplementary Figure 9**

Dominant negative inhibition of WT TR $\beta$ 1 by A263V mutant TR $\alpha$ 1 was tested in cells cotransfected with reporter gene and equal combinations of expression vectors as indicated. \* p<0.05; \*\*\*p<0.001,
